# Supplementary material for: Association of PLGA Microspheres to Carrier Pellets by Fluid Bed Coating: A Novel Approach towards Improving the Flowability of Microparticles
Source: Hindawi journal article supplement (doi:10.1155/2018/3874348), 2018-07-02
Supplement: f1 [file 3874348.f1.pdf]

**Association of PLGA microspheres to carrier pellets by fluid bed coating: a novel approach towards improving the flowability of microparticles**

André O'Reilly Beringhs<sup>a,b</sup>, Aline Benedita dos Santos Fonseca<sup>a</sup>, Angela Machado De Campos<sup>a</sup>,

Diva Sonaglio<sup>a</sup>

*<sup>a</sup> Department of Pharmaceutical Sciences, Center of Health Sciences, Federal University of Santa Catarina, Florianópolis, Brazil.*

*<sup>b</sup> Department of Pharmaceutical Sciences, School of Pharmacy, University of Connecticut, Storrs, United States of America.*

## SUPPLEMENTARY MATERIALS

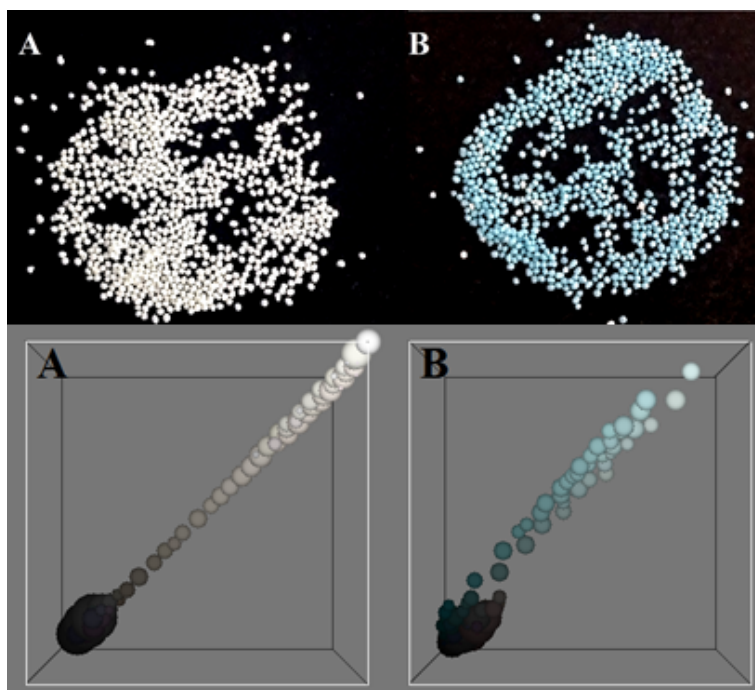

**Figure S1:** RGB color histograms obtained for (A) uncoated carrier pellets and (B) experiment #15 formulation (99.1% of coated surface).

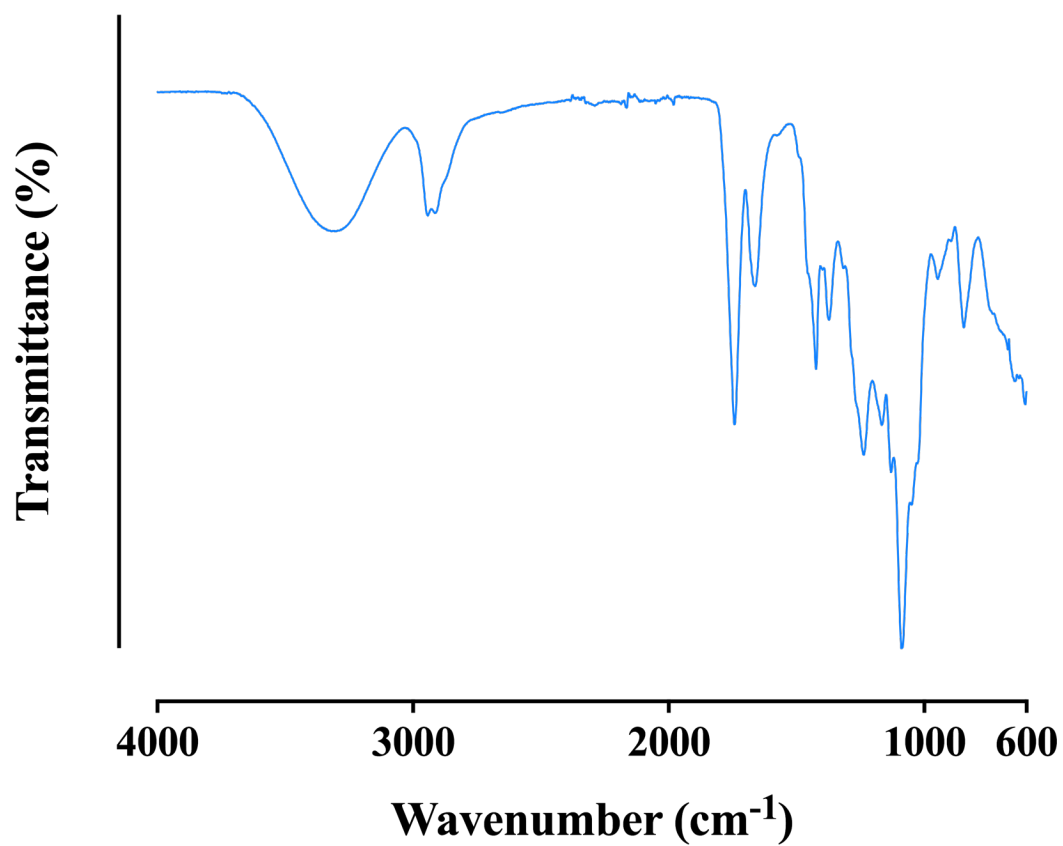

**Figure S2:** Representative ATR-FTIR spectrum of *C. glaziovii* freeze-dried extract.

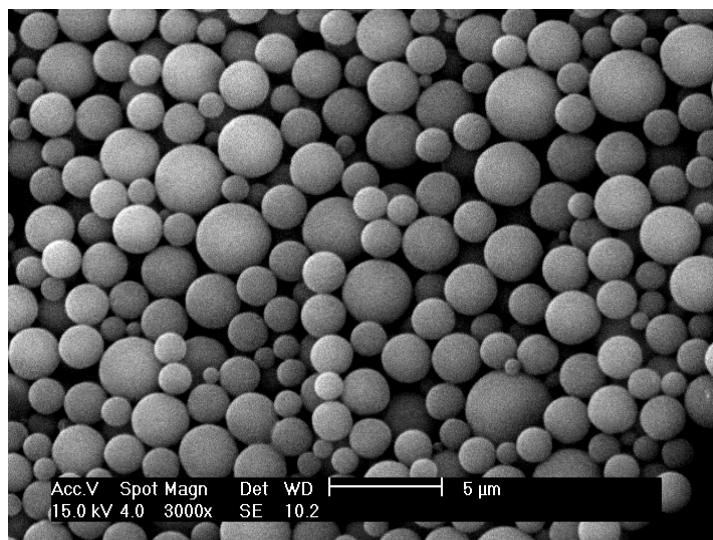

**Figure S3:** Representative scanning electron microscopy image of the *Cecropia glaziovii*-loaded PLGA microspheres (3000x).

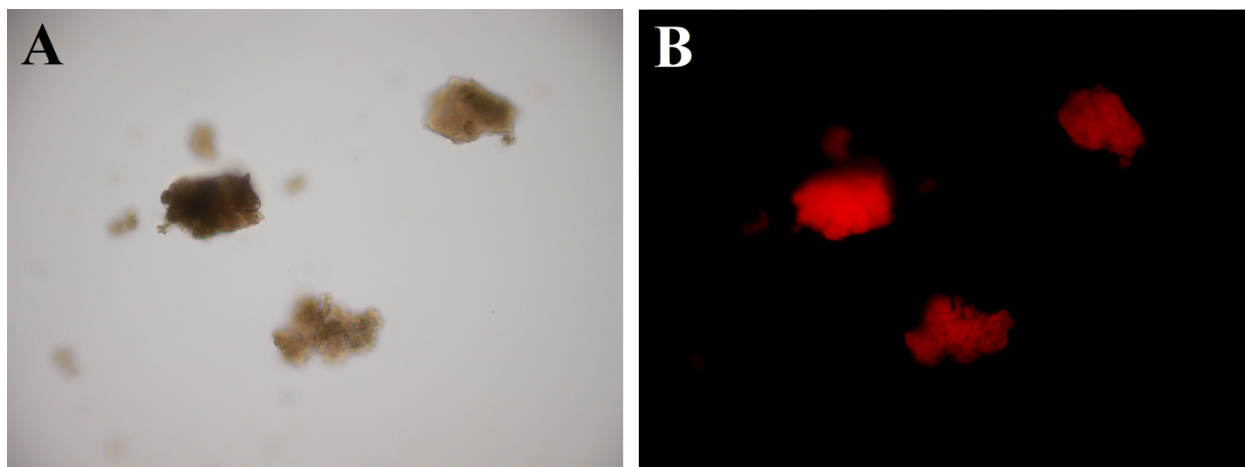

**Figure S4:** Representative (A) light microscopy and (B) epifluorescence microscopy images of *Cecropia glaziovii* freeze-dried extract particles (40x magnification).

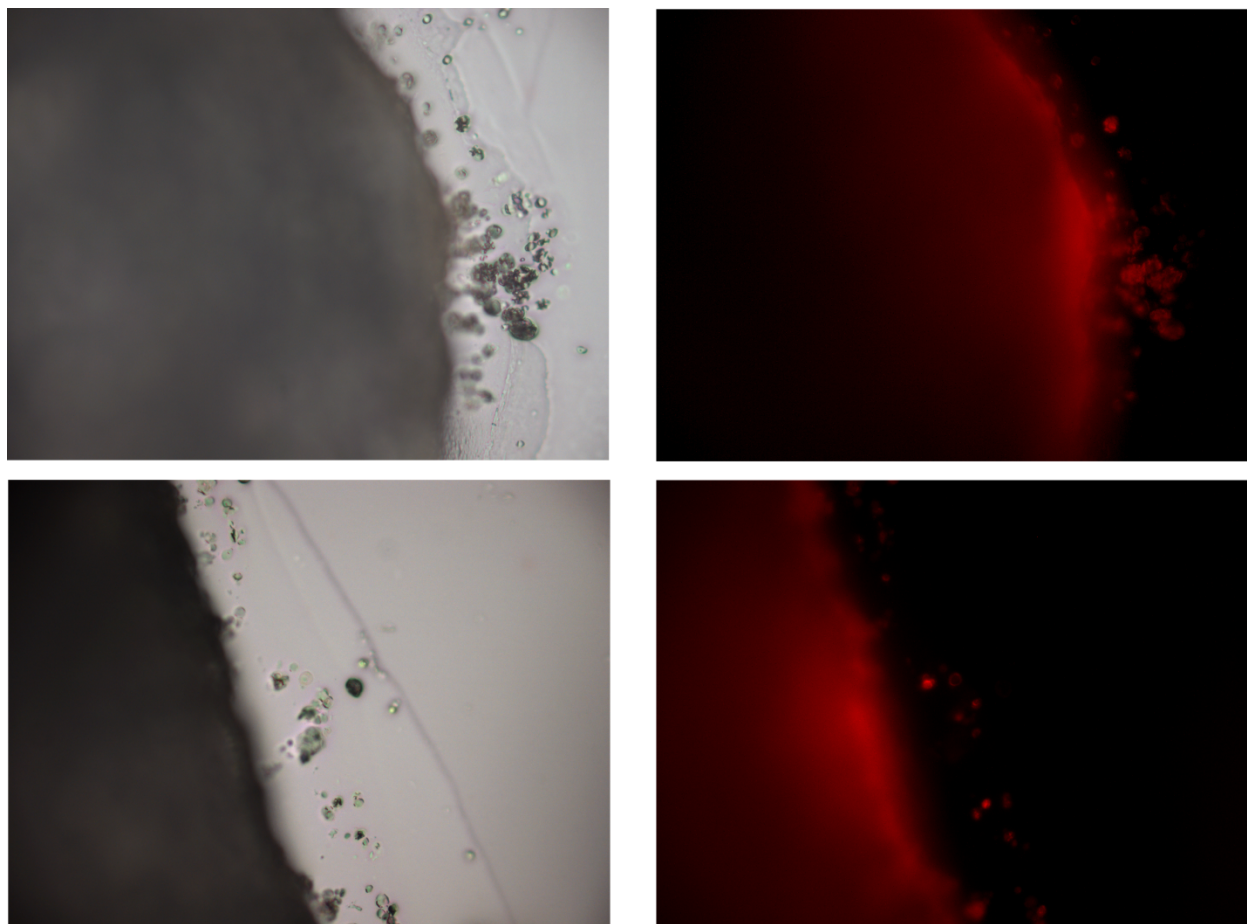

**Figure S5:** Representative images of cryosectioned microspheres-coated pellets under light (left column) and epifluorescence microscopy (right column).

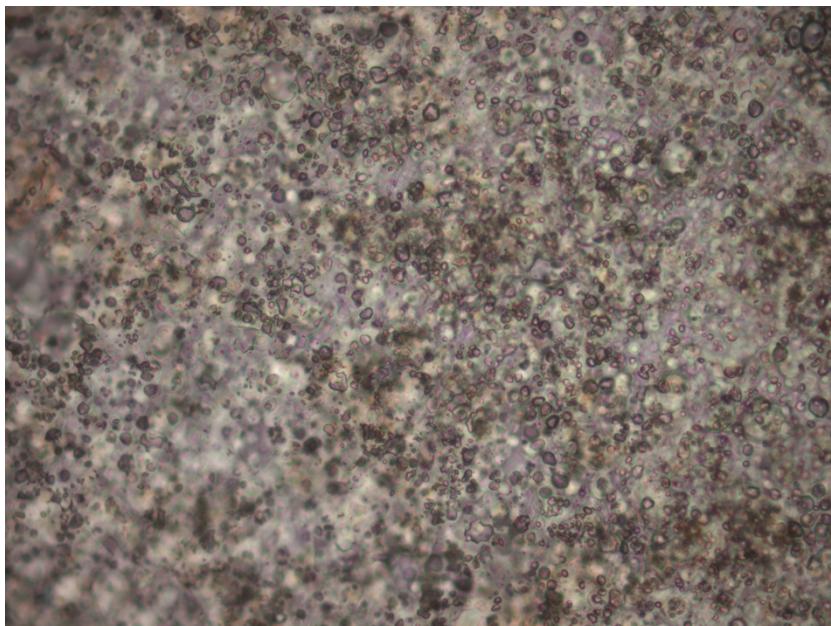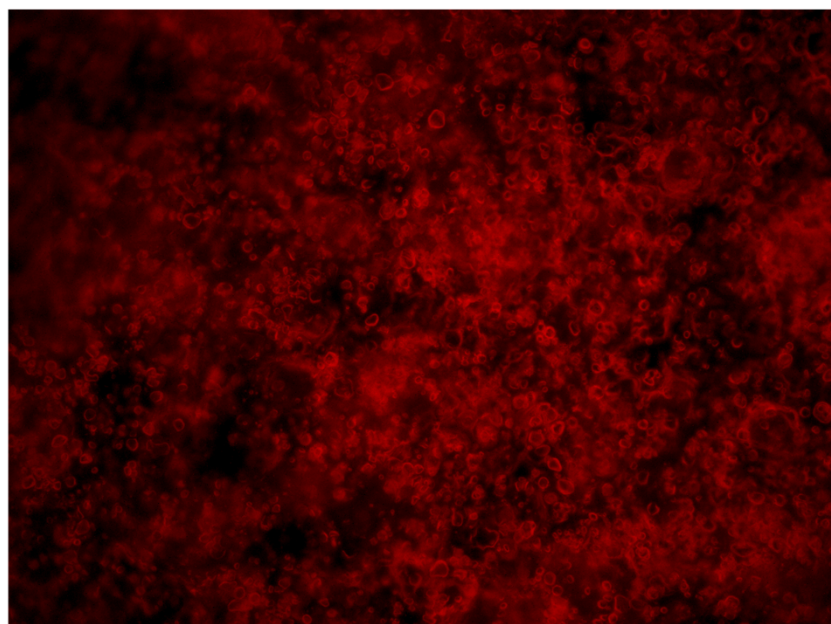

**Figure S6:** Light microscopy and epifluorescence microscopy of the coating film extracted from the microspheres-coated pellets using a scalpel.
